# Supplementary material for: Morphological Characters Are Compatible with Mitogenomic Data in Resolving the Phylogeny of Nymphalid Butterflies (Lepidoptera: Papilionoidea: Nymphalidae)
Source: PubMed Central journal article supplement (PMC4393276; doi:10.1371/journal.pone.0124349), 2015-04-10
Supplement: pone.0124349.s007.pdf [file pone.0124349.s007.pdf]

**Table S1. Materials and their sources in this study.**

| <b>Subfamily</b> | <b>Species</b>                | <b>Sampling locality</b>      | <b>Sampling time</b> |
|------------------|-------------------------------|-------------------------------|----------------------|
| Charaxinae       | <i>Polyura nepenthes</i>      | Yandangshan, Zhejiang, China  | July 2008            |
| Heliconiinae     | <i>Cethosia biblis</i>        | Jiulianshan, Jiangxi, China   | August 2009          |
| Biblidinae       | <i>Ariadne ariadne</i>        | Jianfengling, Hainan, China   | August 2008          |
| Nymphalinae      | <i>Hypolimnas bolina</i>      | Jiulianshan, Jiangxi, China   | August 2009          |
| Pseudergolinae   | <i>Dichorragia nesimachus</i> | Huangshan, Anhui, China       | August 2010          |
| Morphinae        | <i>Stichopthalma howqua</i>   | Dujiangyan, Sichuan, China    | July 2006            |
| Cyrestinae       | <i>Cyrestis thyodamas</i>     | Qiongzong, Hainan, China      | May 2009             |
| Danainae         | <i>Parantica aglea</i>        | Qiongzong, Hainan, China      | May 2009             |
| Satyrinae        | <i>Elymnias hypermnestra</i>  | Jianfengling, Hainan, China   | August 2008          |
|                  | <i>Lethe dura</i>             | Qingchengshan, Sichuan, China | May 2012             |
|                  | <i>Callerebia suroia</i>      | Lijiang, Yunnan, China        | July 2006            |
