# Supplementary material for: Morphological Characters Are Compatible with Mitogenomic Data in Resolving the Phylogeny of Nymphalid Butterflies (Lepidoptera: Papilionoidea: Nymphalidae)
Source: PubMed Central journal article supplement (PMC4393276; doi:10.1371/journal.pone.0124349), 2015-04-10
Supplement: pone.0124349.s008.pdf [file pone.0124349.s008.pdf]

**Table S2. Predicted initiation and termination codons distribution of the 13 mitochondrial PCGs among Nymphalidae species in this study.**

| Species                         | Start codon |     |     |     |     |     | Stop codon |     |    |   |
|---------------------------------|-------------|-----|-----|-----|-----|-----|------------|-----|----|---|
|                                 | ATA         | ATT | ATC | ATG | CGA | TTG | TAA        | TAG | TA | T |
| <i>Apatura ilia</i>             | 2           | 3   | 0   | 7   | 1   | 0   | 6          | 2   | 0  | 5 |
| <i>Apatura metis</i>            | 1           | 4   | 0   | 7   | 1   | 0   | 9          | 1   | 0  | 3 |
| <i>Sasakia charonda</i>         | 6           | 2   | 0   | 5   | 0   | 0   | 10         | 1   | 0  | 2 |
| <i>Sasakia funebris</i>         | 3           | 3   | 0   | 6   | 1   | 0   | 8          | 1   | 0  | 4 |
| <i>Timelaea maculata</i>        | 1           | 3   | 1   | 7   | 1   | 0   | 8          | 1   | 0  | 4 |
| <i>Ariadne ariadne</i>          | 0           | 5   | 0   | 7   | 1   | 0   | 7          | 0   | 2  | 4 |
| <i>Cyrestis thyodamas</i>       | 3           | 2   | 1   | 6   | 1   | 0   | 8          | 0   | 0  | 5 |
| <i>Kallima inachus</i>          | 1           | 3   | 0   | 8   | 1   | 0   | 8          | 2   | 1  | 2 |
| <i>Melitaea cinxia</i>          | 0           | 5   | 0   | 7   | 1   | 0   | 9          | 0   | 2  | 2 |
| <i>Hypolimnas bolina</i>        | 0           | 4   | 1   | 7   | 1   | 0   | 7          | 1   | 1  | 4 |
| <i>Junonia orithya</i>          | 0           | 4   | 1   | 7   | 1   | 0   | 9          | 0   | 2  | 2 |
| <i>Dichorragia nesimachus</i> ▼ | 3           | 1   | 0   | 7   | 1   | 0   | 10         | 1   | 0  | 2 |
| <i>Argyreus hyperbius</i>       | 3           | 3   | 0   | 6   | 1   | 0   | 11         | 0   | 0  | 2 |
| <i>Acraea issoria</i>           | 2           | 2   | 0   | 8   | 0   | 1   | 12         | 0   | 0  | 1 |
| <i>Fabriciana nerippe</i>       | 1           | 5   | 0   | 6   | 0   | 1   | 8          | 0   | 2  | 3 |
| <i>Issoria lathonia</i>         | 0           | 5   | 0   | 7   | 1   | 0   | 8          | 0   | 2  | 3 |
| <i>Heliconius melpomene</i>     | 1           | 5   | 0   | 6   | 0   | 1   | 10         | 3   | 0  | 0 |
| <i>Cethosia biblis</i>          | 1           | 4   | 1   | 6   | 1   | 0   | 6          | 1   | 3  | 3 |
| <i>Parathyma sulpitia</i>       | 1           | 4   | 0   | 7   | 1   | 0   | 9          | 0   | 0  | 4 |
| <i>Libythea celtis</i>          | 0           | 4   | 1   | 7   | 1   | 0   | 8          | 1   | 0  | 4 |
| <i>Eumenis autonoe</i>          | 0           | 2   | 3   | 7   | 1   | 0   | 10         | 0   | 0  | 3 |
| <i>Melanitis leda</i>           | 0           | 2   | 2   | 8   | 1   | 0   | 8          | 0   | 0  | 5 |
| <i>Elymnias hypermnestra</i>    | 1           | 2   | 2   | 7   | 1   | 0   | 8          | 0   | 0  | 5 |
| <i>Lethe dura</i>               | 2           | 4   | 0   | 6   | 1   | 0   | 7          | 0   | 0  | 6 |
| <i>Callerebia suroia</i>        | 2           | 3   | 1   | 6   | 1   | 0   | 7          | 1   | 0  | 5 |
| <i>Stichopthalma howqua</i> ▼   | 1           | 3   | 1   | 6   | 1   | 0   | 11         | 0   | 1  | 1 |
| <i>Polyura nepenthes</i>        | 1           | 4   | 1   | 6   | 1   | 0   | 10         | 0   | 1  | 2 |
| <i>Calinaga davidis</i>         | 0           | 4   | 1   | 7   | 0   | 1   | 11         | 0   | 1  | 1 |
| <i>Euploea mulciber</i>         | 1           | 4   | 0   | 7   | 1   | 0   | 8          | 1   | 0  | 4 |
| <i>Danaus plexippus</i>         | 1           | 4   | 0   | 7   | 1   | 0   | 9          | 0   | 0  | 4 |
| <i>Danaus chrysippus</i>        | 0           | 5   | 0   | 7   | 1   | 0   | 9          | 0   | 0  | 4 |
| <i>Ideopsis similes</i>         | 2           | 4   | 0   | 6   | 1   | 0   | 8          | 1   | 0  | 4 |
| <i>Parantica aglea</i>          | 2           | 2   | 2   | 6   | 1   | 0   | 7          | 2   | 0  | 4 |

▼ indicates lack of initiation codon for *nad2* gene in the mitogenome.
